# Supplementary material for: Role of van der Waals forces in the metal–insulator transition of transition metal oxides
Source: Royal Society of Chemistry journal article supplement (doi:10.1039/d2cp00282e), 2022-01-01
Supplement: d2cp00282e1.pdf [file d2cp00282e1.pdf]

## Supplementary Information of Role of van der Waals forces in the metal–insulator transition of transition metal oxides

Da Chen, Quan Ming Li\* and Wang Gao\*

Key Laboratory of Automobile Materials, Ministry of Education, and School of  
Materials Science and Engineering, Jilin University, Changchun 130022, China.

Corresponding Author\* email: [lqm@jlu.edu.cn](mailto:lqm@jlu.edu.cn), [wgao@jlu.edu.cn](mailto:wgao@jlu.edu.cn).

### Structural information

Table S1. Crystal structures of VO<sub>2</sub><sup>1,2</sup>

| Phase     | Space group               | Lattice parameters (Å, °) | Atom | x       | y       | z       |
|-----------|---------------------------|---------------------------|------|---------|---------|---------|
| Metal     | <i>P4<sub>2</sub>/mnm</i> | <i>a</i> = 4.5546         | V    | 0.00000 | 0.00000 | 0.00000 |
|           |                           | <i>b</i> = 4.5546         | O    | 0.30010 | 0.30010 | 0.00000 |
|           |                           | <i>c</i> = 2.8514         |      |         |         |         |
| Insulator | <i>P2<sub>1</sub>/c</i>   | <i>a</i> = 5.7517         | V    | 0.23947 | 0.97894 | 0.02646 |
|           |                           | <i>b</i> = 4.5378         | O    | 0.10616 | 0.21185 | 0.20859 |
|           |                           | <i>c</i> = 5.3825         | O    | 0.40051 | 0.70258 | 0.29884 |
|           |                           | <i>β</i> = 122.6460       |      |         |         |         |

Table S2. Crystal structures of Ti<sub>4</sub>O<sub>7</sub><sup>3</sup>

| Phase     | Space group | Lattice parameters (Å, °) | Atom | x       | y       | z       |
|-----------|-------------|---------------------------|------|---------|---------|---------|
| Metal     | <i>A-1</i>  | <i>a</i> = 5.5930         | Ti   | 0.21617 | 0.15282 | 0.06282 |
|           |             | <i>b</i> = 7.1250         | Ti   | 0.21852 | 0.65258 | 0.06618 |
|           |             | <i>c</i> = 12.4560        | Ti   | 0.68340 | 0.44002 | 0.20115 |
|           |             | <i>α</i> = 95.0200        | Ti   | 0.68858 | 0.94231 | 0.20136 |
|           |             | <i>β</i> = 95.2100        | O    | 0.10730 | 0.86270 | 0.01510 |
|           |             | <i>γ</i> = 108.7300       | O    | 0.58700 | 0.79220 | 0.05770 |
|           |             |                           | O    | 0.85580 | 0.49640 | 0.08110 |
|           |             |                           | O    | 0.32810 | 0.43850 | 0.13870 |
|           |             |                           | O    | 0.52650 | 0.14490 | 0.16390 |
|           |             |                           | O    | 0.03770 | 0.07000 | 0.19810 |
| Insulator | <i>A-1</i>  | <i>a</i> = 5.5900         | Ti   | 0.21730 | 0.15600 | 0.06404 |
|           |             | <i>b</i> = 7.1280         | Ti   | 0.21720 | 0.65490 | 0.06596 |
|           |             | <i>c</i> = 12.4830        | Ti   | 0.68160 | 0.44240 | 0.20048 |
|           |             | <i>α</i> = 95.0300        | Ti   | 0.68750 | 0.94250 | 0.19988 |
|           |             |                           |      |         |         |         |

|  |  |                     |   |         |         |         |
|--|--|---------------------|---|---------|---------|---------|
|  |  | $\beta = 95.3400$   | O | 0.10770 | 0.86180 | 0.01560 |
|  |  | $\gamma = 108.8900$ | O | 0.58710 | 0.79250 | 0.05670 |
|  |  |                     | O | 0.85380 | 0.49670 | 0.08000 |
|  |  |                     | O | 0.32330 | 0.44000 | 0.13950 |
|  |  |                     | O | 0.52800 | 0.14250 | 0.16590 |
|  |  |                     | O | 0.03880 | 0.06910 | 0.19720 |
|  |  |                     | O | 0.29250 | 0.78540 | 0.22340 |

Table S3. Crystal structures of  $\text{CaFeO}_3^{4,5}$

| Phase     | Space group             | Lattice parameters ( $\text{\AA}$ , $^\circ$ ) | Atom | x       | y       | z        |
|-----------|-------------------------|------------------------------------------------|------|---------|---------|----------|
| Metal     | <i>Pbnm</i>             | $a = 5.3263$<br>$b = 5.3527$<br>$c = 7.5399$   | Ca   | 0.99500 | 0.03280 | 0.25000  |
|           |                         |                                                | Fe   | 0.00000 | 0.50000 | 0.00000  |
|           |                         |                                                | O    | 0.71290 | 0.28580 | 0.03270  |
|           |                         |                                                | O    | 0.06630 | 0.49080 | 0.25000  |
| Insulator | <i>P2<sub>1</sub>/n</i> | $a = 5.3118$<br>$b = 5.3477$<br>$c = 7.5206$   | Ca   | 0.99360 | 0.03710 | 0.25110  |
|           |                         |                                                | Fe   | 0.50000 | 0.00000 | 0.00000  |
|           |                         |                                                | Fe   | 0.00000 | 0.50000 | 0.00000  |
|           |                         |                                                | O    | 0.30000 | 0.72000 | -0.03300 |
|           |                         |                                                | O    | 0.21900 | 0.20600 | -0.03180 |
|           |                         |                                                | O    | 0.07610 | 0.49270 | 0.25400  |

Table S4. Crystal structures of  $\text{BaV}_{10}\text{O}_{15}^6$

| Phase     | Space group | Lattice parameters ( $\text{\AA}$ , $^\circ$ ) | Atom | x        | y       | z       |
|-----------|-------------|------------------------------------------------|------|----------|---------|---------|
| Metal     | <i>Cmca</i> | $a = 11.5951$<br>$b = 9.9458$<br>$c = 9.3975$  | Ba   | 0.00000  | 0.50000 | 0.00000 |
|           |             |                                                | V    | 0.37110  | 0.40990 | 0.13629 |
|           |             |                                                | V    | -0.24620 | 0.67110 | 0.11060 |
|           |             |                                                | V    | 0.50000  | 0.67700 | 0.13870 |
|           |             |                                                | O    | 0.12080  | 0.24730 | 0.00100 |
|           |             |                                                | O    | 0.62980  | 0.58850 | 0.24550 |
|           |             |                                                | O    | 0.50000  | 0.34350 | 0.24810 |
|           |             |                                                | O    | -0.25680 | 0.50000 | 0.00000 |
|           |             |                                                | O    | 0.25000  | 0.32430 | 0.25000 |
|           |             |                                                | O    | 0.50000  | 0.50000 | 0.00000 |
| Insulator | <i>Pbca</i> | $a = 11.6120$<br>$b = 9.8605$<br>$c = 9.4149$  | Ba   | 0.00000  | 0.50000 | 0.00000 |
|           |             |                                                | V    | 0.50520  | 0.67540 | 0.14150 |
|           |             |                                                | V    | 0.37470  | 0.41120 | 0.13630 |
|           |             |                                                | V    | -0.24100 | 0.68040 | 0.11200 |
|           |             |                                                | V    | 0.24860  | 0.83010 | 0.60650 |
|           |             |                                                | V    | 0.63440  | 0.09690 | 0.63190 |
|           |             |                                                | O    | -0.25930 | 0.49000 | 0.00100 |
|           |             |                                                | O    | 0.11110  | 0.24800 | 0.00400 |
|           |             |                                                | O    | 0.87270  | 0.25100 | 0.50600 |

|  |  |  |   |         |         |         |
|--|--|--|---|---------|---------|---------|
|  |  |  | O | 0.24100 | 0.32650 | 0.25200 |
|  |  |  | O | 0.63630 | 0.58200 | 0.24300 |
|  |  |  | O | 0.37330 | 0.90500 | 0.74700 |
|  |  |  | O | 0.50500 | 0.34340 | 0.24200 |
|  |  |  | O | 0.50000 | 0.50000 | 0.00000 |

## References

- 1 J. M. Longo, P. Kierkegaard, C. Ballhausen, U. Ragnarsson, S. Rasmussen, E. Sunde and N. Sørensen, *Acta Chem. Scand*, 1970, **24**, 420-426.
- 2 D. McWhan, M. Marezio, J. Remeika and P. Dernier, *Physical Review B*, 1974, **10**, 490.
- 3 M. Marezio, D. McWhan, P. Dernier and J. Remeika, *Journal of Solid State Chemistry*, 1973, **6**, 213-221.
- 4 T. Takeda, R. Kanno, Y. Kawamoto, M. Takano, S. Kawasaki, T. Kamiyama and F. Izumi, *Solid state sciences*, 2000, **2**, 673-687.
- 5 P. Woodward, D. Cox, E. Moshopoulou, A. Sleight and S. Morimoto, *Physical Review B*, 2000, **62**, 844.
- 6 T. Kajita, T. Kanzaki, T. Suzuki, J. Kim, K. Kato, M. Takata and T. Katsufuji, *Physical Review B*, 2010, **81**, 060405.
